# Supplementary material for: Computational prediction of solvation structures in calcium battery electrolytes
Source: Royal Society of Chemistry journal article supplement (doi:10.1039/d4ta06675h), 2024-01-01
Supplement: d4ta06675h1.pdf [file d4ta06675h1.pdf]

# Supplementary Information

## Computational Prediction of Solvation Structure in Calcium Battery Electrolytes

Heonjae Jeong<sup>a,b,c\*</sup>, Haimeng Wang<sup>a,b</sup>, Lei Cheng<sup>a,b</sup>

*<sup>a</sup>The Joint Center for Energy Storage Research (JCESR), Argonne National Laboratory, Lemont, Illinois 60439, United States*

*<sup>b</sup>Materials Science Division, Argonne National Laboratory, Lemont, Illinois 60439, United States*

*<sup>c</sup>Department of Electronic Engineering, Gachon University, 1342 Seongnam-daero, Seongnam, Gyeonggi 13120, South Korea*

\*hjeong@gachon.ac.kr

**Keywords:** calcium battery electrolytes, solvation structure, ab initio molecular dynamics, density functional theory, machine learning force field

## Supplementary Figures

|                      | Anions                    |                     |                       |                       |                       |                       |                       |              |                 |                                  |                  |
|----------------------|---------------------------|---------------------|-----------------------|-----------------------|-----------------------|-----------------------|-----------------------|--------------|-----------------|----------------------------------|------------------|
|                      | Fluorinated Alkoxy Anions |                     |                       |                       |                       |                       |                       | Other Anions |                 |                                  |                  |
|                      | Borates                   |                     |                       | Aluminates            |                       |                       |                       | TFSI         | PF <sub>6</sub> | CB <sub>11</sub> H <sub>12</sub> | BPh <sub>4</sub> |
| B(TFIP) <sub>4</sub> | B(HFIP) <sub>4</sub>      | B(PIN) <sub>2</sub> | Al(TFIP) <sub>4</sub> | Al(HFIP) <sub>4</sub> | Al(TFTB) <sub>4</sub> | Al(HFTB) <sub>4</sub> | Al(PFTB) <sub>4</sub> |              |                 |                                  |                  |
| Solvents             |                           |                     |                       |                       |                       |                       |                       |              |                 |                                  |                  |
| G1                   |                           |                     |                       |                       |                       |                       |                       |              |                 |                                  |                  |
| G2                   |                           |                     |                       |                       |                       |                       |                       |              |                 |                                  |                  |
| EC                   |                           |                     |                       |                       |                       |                       |                       |              |                 |                                  |                  |
| THF                  |                           |                     |                       |                       |                       |                       |                       |              |                 |                                  |                  |

### Solvents

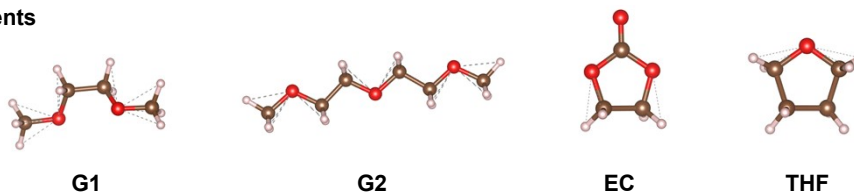

### Anions

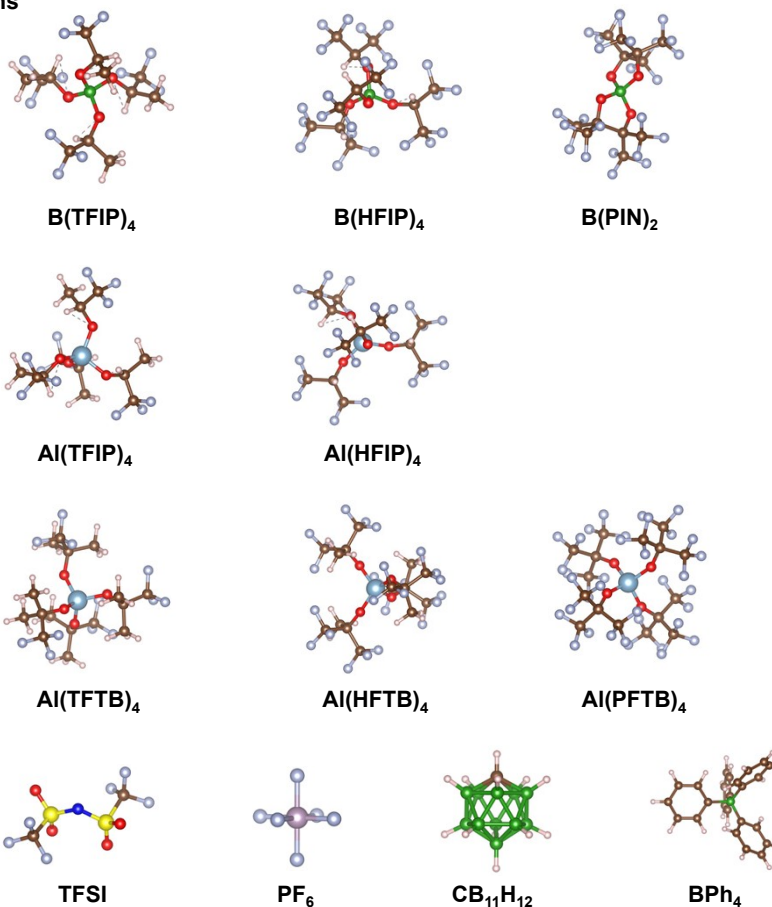

**Figure S1.** Schematics and atomistic structures of solvents and anions that make up the Ca battery electrolytes. The colors assigned to the atoms: red for O, brown for C, white for H, yellow for S, blue for N, light blue for F, cyan for Al, green for B, and light purple for P.

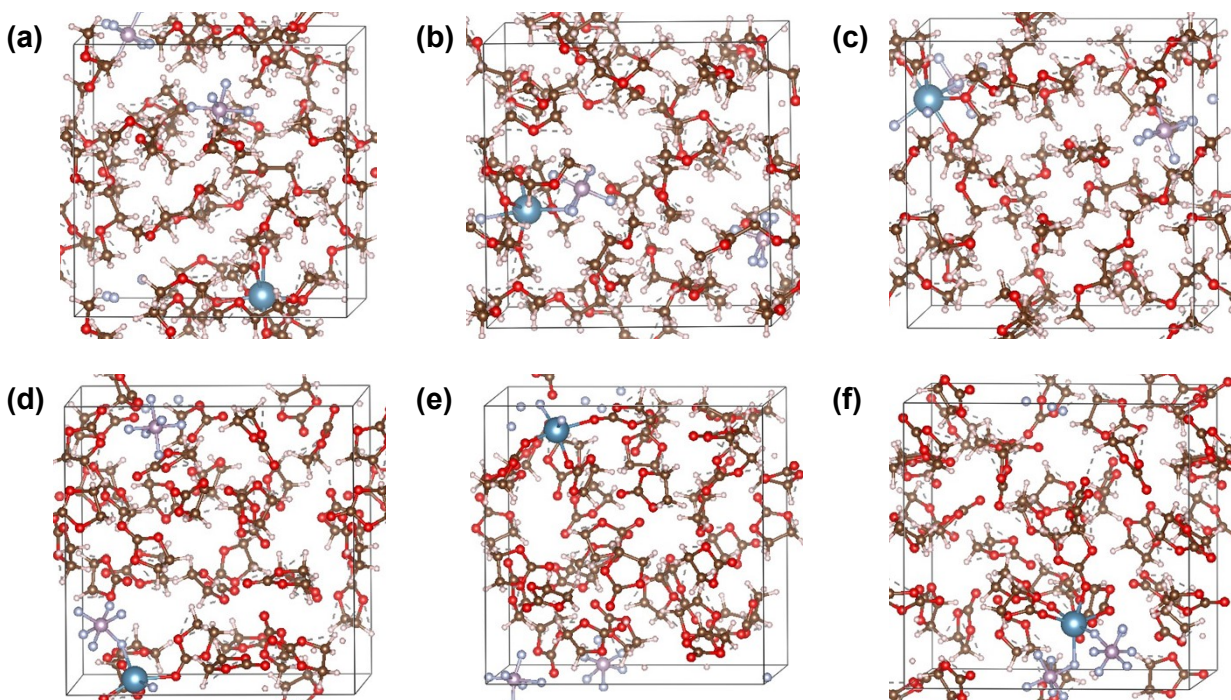

**Figure S2.** Electrolytes of 0.5 M  $\text{Ca}[\text{PF}_6]_2$  in the presence of solvent species with a density of 1 g/ml. (a)-(c) present the snapshots for the final structure of SSIP, CIP-A1, and CIP-A2 in G1 solvent species after AIMD simulations. (d)-(f) present the snapshots for the final structure of SSIP, CIP-A1, and CIP-A2 in EC solvent species after AIMD simulations. In the snapshots, the colors assigned to the atoms: red for O, brown for C, white for H, blue for Ca, light pink for P, and light blue for F.

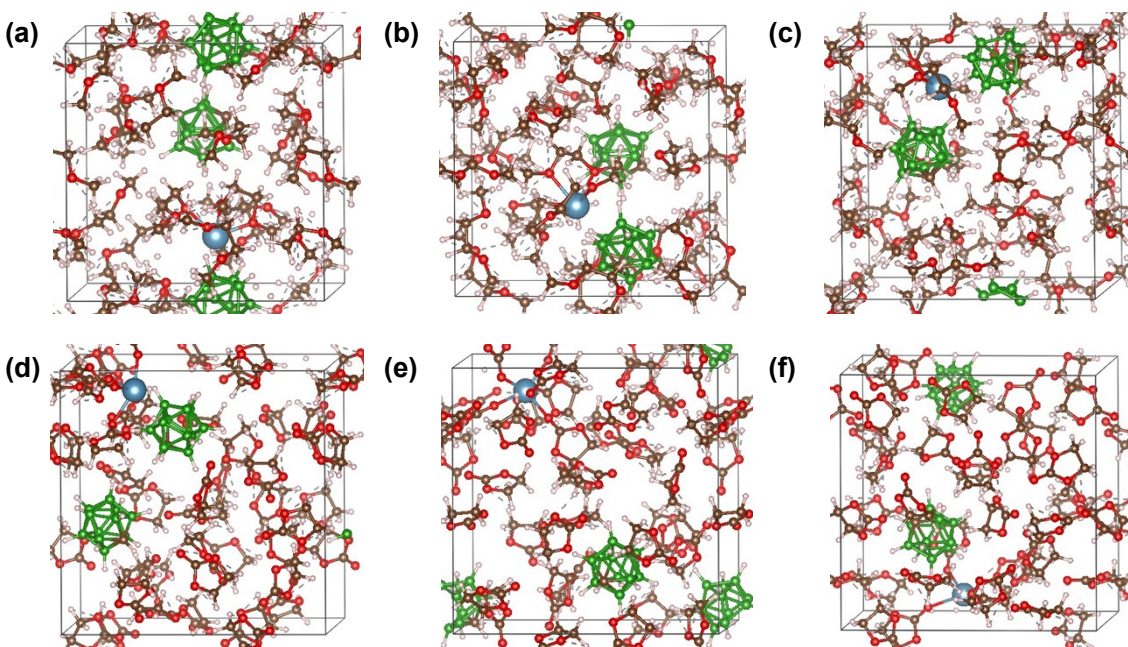

**Figure S3.** Electrolytes of 0.5 M  $\text{Ca}[\text{CB}_{11}\text{H}_{12}]_2$  in the presence of solvent species with a density of 1 g/ml. (a)-(c) present the snapshots for the final structure of SSIP, CIP-A1, and CIP-A2 in G1 solvent species after AIMD simulations. (d)-(f) present the snapshots for the final structure of SSIP, CIP-A1, and CIP-A2 in EC solvent species after AIMD simulations. In the snapshots, the colors assigned to the atoms: red for O, brown for C, white for H, blue for Ca, and green for B.



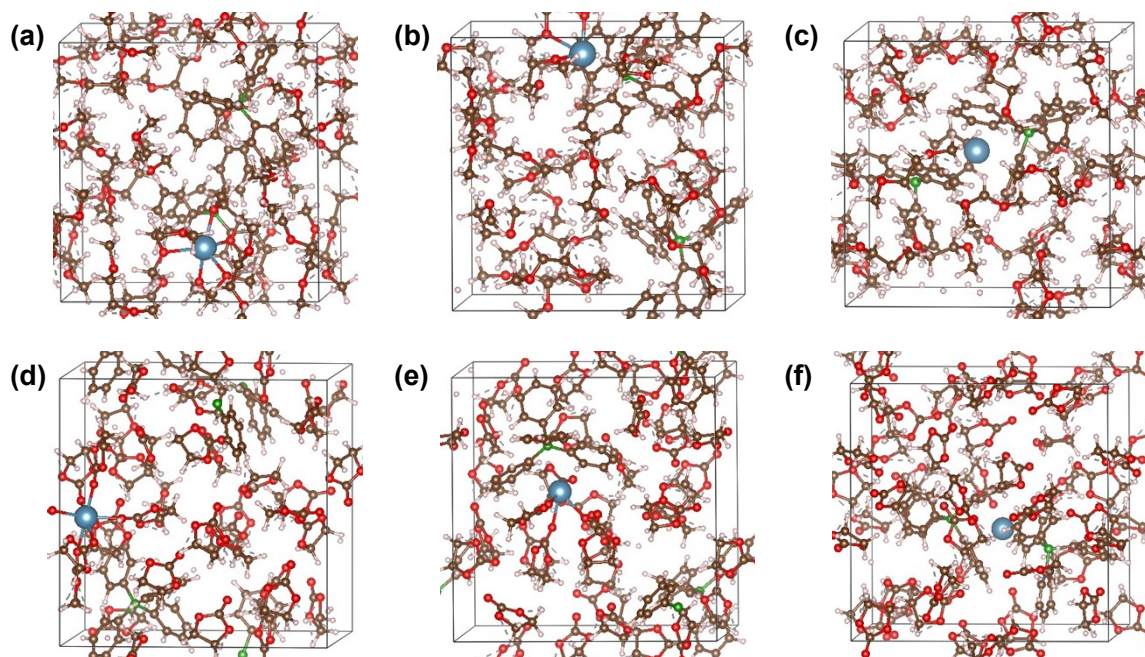

**Figure S4.** Electrolytes of 0.5 M  $\text{Ca}[\text{BPh}_4]_2$  in the presence of solvent species with a density of 1 g/ml. (a)-(c) present the snapshots for the final structure of SSIP, CIP-A1, and CIP-A2 in G1 solvent species after AIMD simulations. (d)-(f) present the snapshots for the final structure of SSIP, CIP-A1, and CIP-A2 in EC solvent species after AIMD simulations. In the snapshots, the colors assigned to the atoms: red for O, brown for C, white for H, blue for Ca, and green for B.

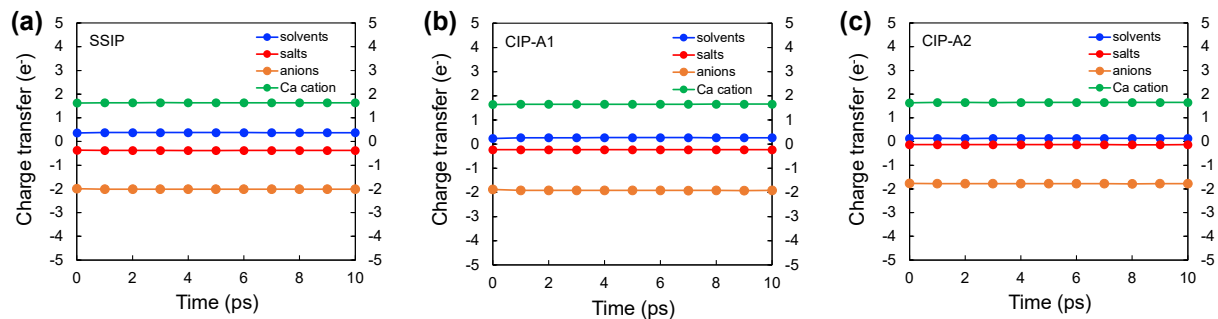

**Figure S5.** Bader charge analysis for electrolytes of 0.5 M  $\text{Ca}[\text{Al}(\text{TFIP})_4]_2$  with a density of 1 g/ml. The diagram shows the initial structure of (a) SSIP, (b) CIP-A1, and (c) CIP-A2 in G1 solvent species.

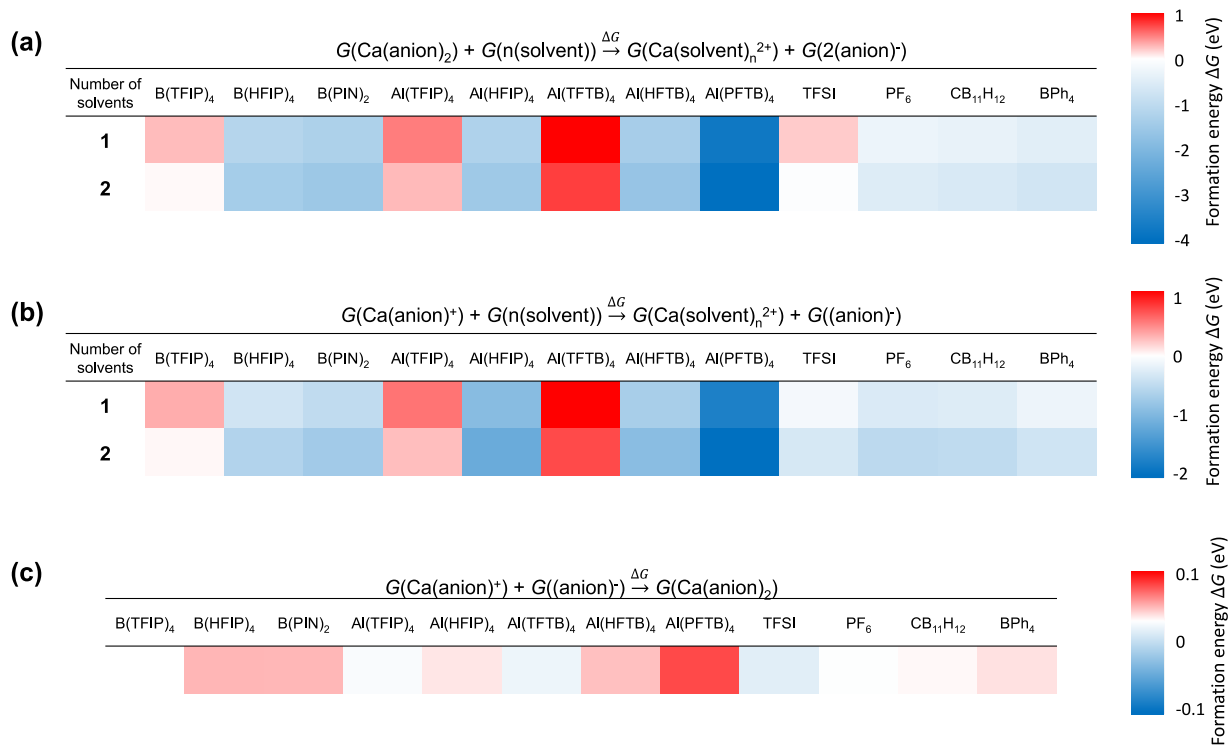

**Figure S6.** Heat map illustrating the formation free energies ( $\Delta G$ ) among electrolyte solvation structures with G2 solvents: (a) SSIP formation energy transformation from CIP-A2, (b) SSIP formation energy transformation from CIP-A1, and (c) CIP-A2 formation energy transformation from CIP-A1.

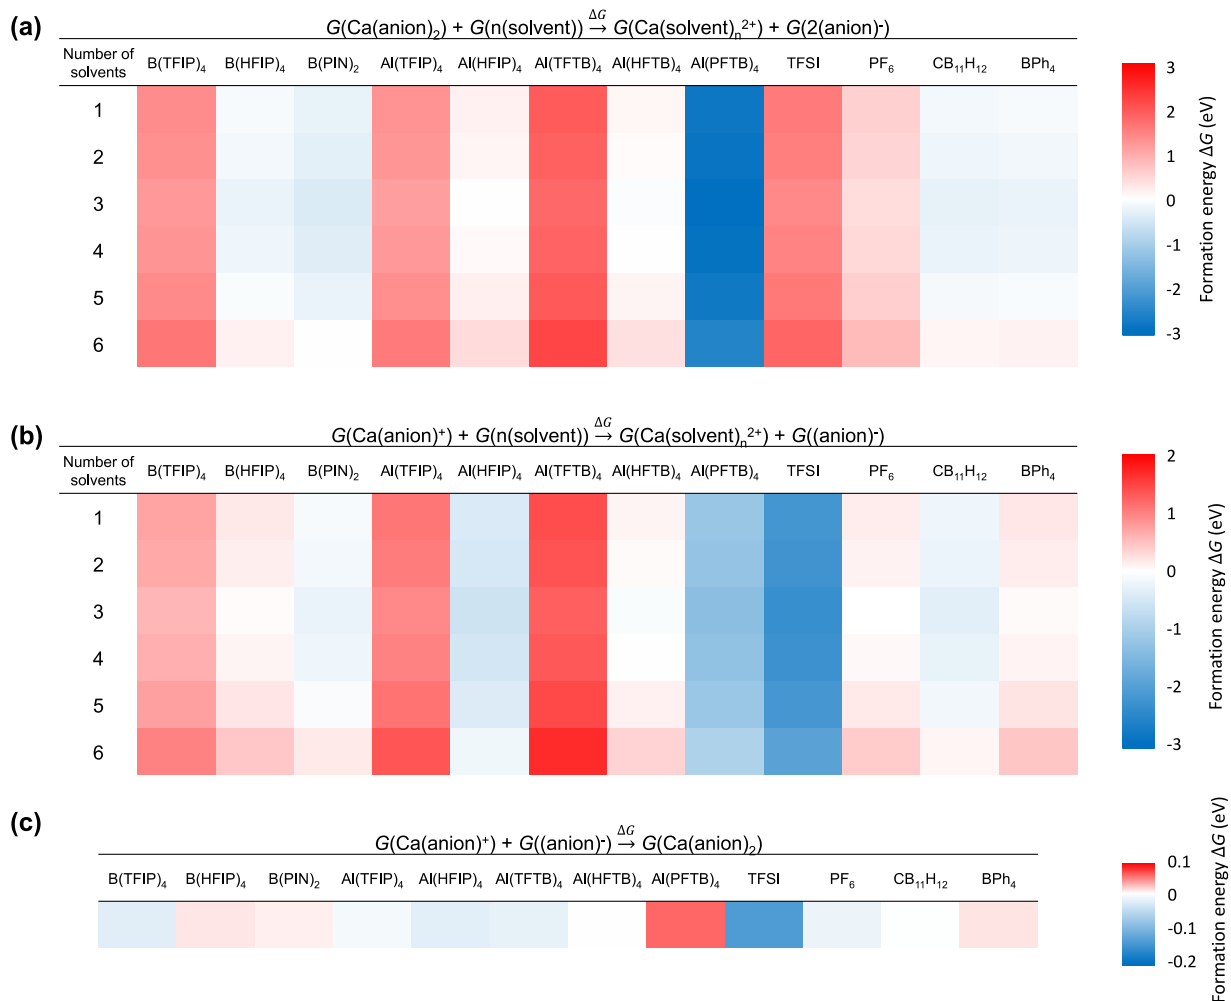

**Figure S7.** Heat map illustrating the formation free energies ( $\Delta G$ ) among electrolyte solvation structures with THF solvents: (a) SSIP formation energy transformation from CIP-A2, (b) SSIP formation energy transformation from CIP-A1, and (c) CIP-A2 formation energy transformation from CIP-A1.
